# Supplementary material for: Solution Structure and Peptide Binding of the PTB Domain from the AIDA1 Postsynaptic Signaling Scaffolding Protein
Source: PubMed Central journal article supplement (PMC3683042; doi:10.1371/journal.pone.0065605), 2013-06-14

**Supplementary Figure S1:** A comparison of  $^{15}\text{N}$ -edited HSQC spectra from the (a) AIDA1 PTB5M protein and the (b) AIDA1 PTB5M protein with an APP binding sequence (GYENPTY-KFFE) appended to the N-terminus along with a linker sequence (TLRPPNEATALQ) derived from the native AIDA1 protein. Both protein concentrations are 0.8 mM.

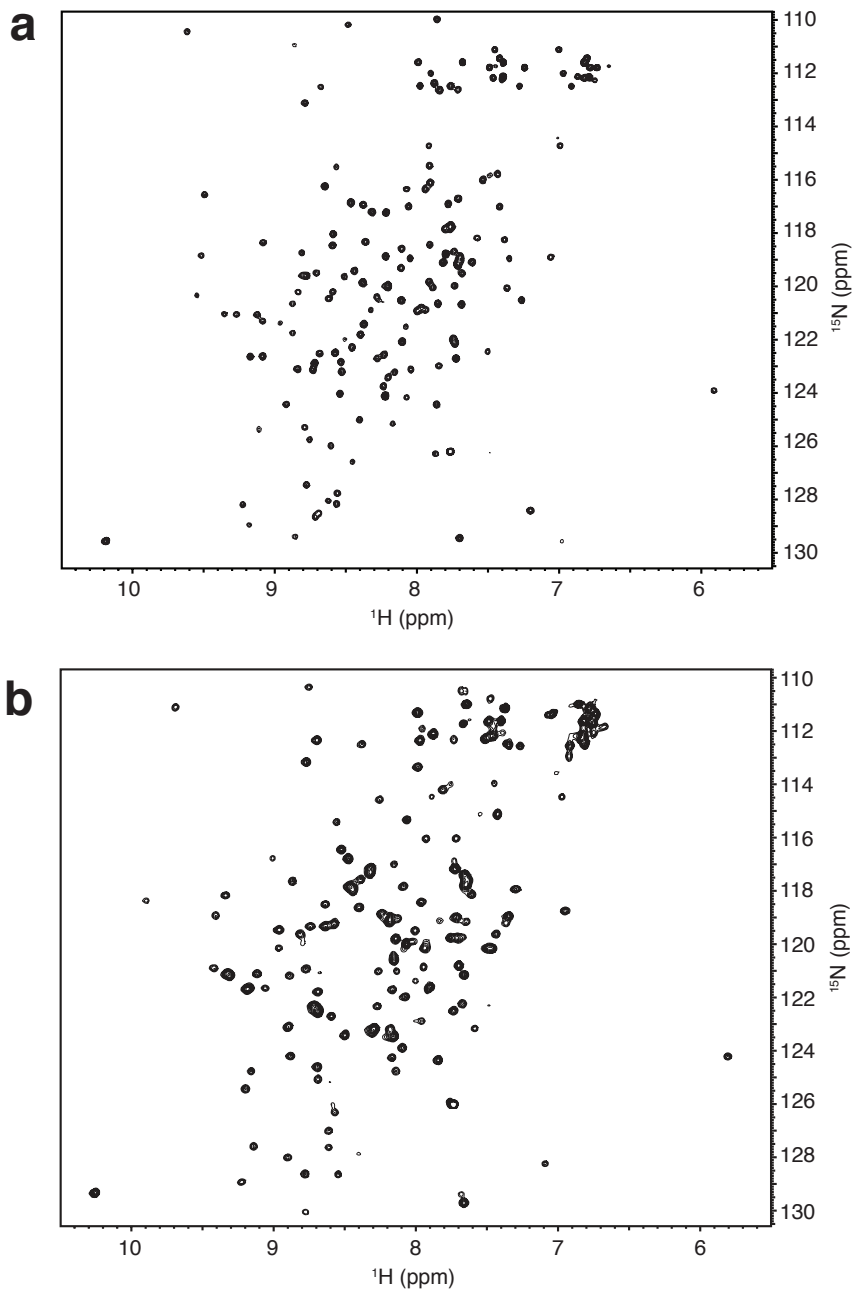

Supplement: pone.0065605.s001.pdf [file pone.0065605.s001.pdf]
